# Supplementary material for: Indirect costs and incidence of caregivers’ short-term absenteeism in Poland, 2006–2016
Source: Springer Nature journal article supplement (doi:10.1186/s12889-019-6952-5), 2019-05-17
Supplement: MOESM1 [file 16731968]

Table A1. Distribution of care episodes by duration of absence and gender of caregiver in others' care in Poland, 2006-2016

| Duration       | Number of episodes in thousands |      |      |      |      |      |      |      |      |      |      |
|----------------|---------------------------------|------|------|------|------|------|------|------|------|------|------|
|                | 2006                            | 2007 | 2008 | 2009 | 2010 | 2011 | 2012 | 2013 | 2014 | 2015 | 2016 |
| <b>Males</b>   |                                 |      |      |      |      |      |      |      |      |      |      |
| 1-5 days       | 18.5                            | 22.3 | 27.4 | 30.1 | 30.9 | 32.2 | 32.1 | 34.1 | 36.7 | 41.9 | 50.9 |
| 6-10 days      | 16.8                            | 18.5 | 21.1 | 20.8 | 19.2 | 18.4 | 16.7 | 16.9 | 16.6 | 17.0 | 19.2 |
| 11-14 days     | 24.3                            | 29.5 | 35.3 | 38.6 | 38.8 | 37.4 | 35.7 | 35.6 | 37.5 | 39.0 | 45.4 |
| 15+ days       | 1.2                             | 1.4  | 1.6  | 1.7  | 1.5  | 1.8  | 2.2  | 2.5  | 2.6  | 3.0  | 3.4  |
| <b>Females</b> |                                 |      |      |      |      |      |      |      |      |      |      |
| 1-5 days       | 25.3                            | 31.2 | 37.2 | 41.3 | 47.1 | 52.5 | 55.6 | 61.2 | 69.2 | 77.8 | 92.8 |
| 6-10 days      | 8.1                             | 9.7  | 11.0 | 10.7 | 11.0 | 11.9 | 12.0 | 12.6 | 13.1 | 14.4 | 15.3 |
| 11-14 days     | 9.8                             | 11.8 | 13.2 | 13.3 | 13.8 | 14.1 | 14.6 | 14.5 | 14.9 | 16.1 | 17.4 |
| 15+ days       | 0.6                             | 0.8  | 1.0  | 1.0  | 0.9  | 1.1  | 1.2  | 1.3  | 1.5  | 1.6  | 1.8  |

Source: [29].
