# Supplementary material for: Indirect costs and incidence of caregivers’ short-term absenteeism in Poland, 2006–2016
Source: Springer Nature journal article supplement (doi:10.1186/s12889-019-6952-5), 2019-05-17
Supplement: MOESM2 [file 16731968]

Table A2. Change in selected population age structure measures during the period of the study in Poland

| <b>Number in thousands (share of total population)</b> |                   |                   |                             |
|--------------------------------------------------------|-------------------|-------------------|-----------------------------|
| <b>Age group</b>                                       | <b>2006</b>       | <b>2016</b>       | <b>2016-2006 difference</b> |
| 0-18 years                                             | 8,229.5 (22.1%)   | 7,286.4 (19.0%)   | -943.1 (-2.6 p.p.)          |
| 65 and more years                                      | 5,116.5 (13.3%)   | 6,303.4 (16.4%)   | 1,186.9 (+3.0 p.p.)         |
| Total population                                       | 38,125.5 (100.0%) | 38,433.0 (100.0%) | 307.5 (-)                   |

Notes: p.p. – percentage point. Source: own calculation based on Central Statistical Office of Poland website (table 'Stan i struktura ludności według wieku w latach 1989-2016' [The condition and structure of the population by age in 1989-2016]; <http://stat.gov.pl/obszary-tematyczne/ludnosc/ludnosc/struktura-ludnosci,16,1.html>).
